# Supplementary material for: Investigation of enhanced third-order optical nonlinearity in novel coenzyme A capped silver nanoparticles
Source: Royal Society of Chemistry journal article supplement (doi:10.1039/d3tc02100a), 2023-01-01
Supplement: d3tc02100a1.pdf [file d3tc02100a1.pdf]

## Electronic Supplementary Information

### Investigation of Enhanced Third-Order Optical Nonlinearity in Novel Coenzyme-A Capped Silver Nanoparticles

Aditya Dileep Kurdekar<sup>#1,2</sup>, Prajal Chettri<sup>#2</sup>, Rajasimha Kurnoothala<sup>2</sup>, Chelli Sai Manohar<sup>3</sup>, Shailesh Srivastava<sup>2</sup>, Krishna Chaitanya Vishnubhatla<sup>2</sup>

#### S1. Estimation of Lattice planes of silver nanoparticles based on TEM-SAED pattern

By using Image J software, we calculated the diameter of the 4 rings as followed in Table as Lengths. These values may vary depending on the taken set scale, but the ratios will come always same.

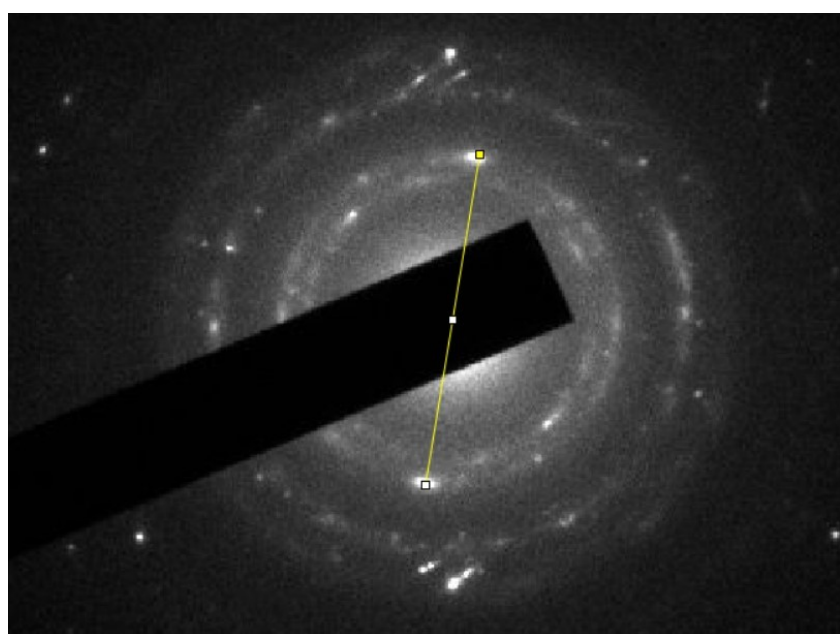

| File | Edit | Font   | Results |         |         |         |  |
|------|------|--------|---------|---------|---------|---------|--|
|      | Area | Mean   | Min     | Max     | Angle   | Length  |  |
| 1    | 135  | 74.186 | 0.802   | 255.000 | -47.411 | 134.469 |  |
| 2    | 157  | 72.232 | 0.000   | 254.944 | -98.858 | 155.859 |  |
| 3    | 222  | 76.548 | 0.000   | 238.790 | -59.482 | 220.554 |  |
| 4    | 259  | 80.780 | 0.000   | 255.000 | -90.000 | 258.000 |  |

From the figure it appears that the first two rings were closer followed by 3rd and 4th were closer indicating a FCC pattern.

For cubic crystals,  $d_{hkl} = a_0 / (h^2 + k^2 + l^2)^{1/2}$  where  $d_{hkl}$  is the d spacing,  $a_0$  is the lattice constant, h,k & l are the Miller indices.

Using the equivalence of D spacing and radius of rings,

$$R_{hkl} = (\lambda L/a_0)(h^2+k^2+l^2)^{1/2}$$

As the value of  $(\lambda L/a_0)$  is constant for a given diffraction pattern, the values of  $R_{hkl}$  vary according to  $(h^2+k^2+l^2)^{1/2}$ .

By using the ratios:

$$R_1/R_2 = d_1/d_2 = (h_1^2+k_1^2+l_1^2)^{1/2} / (h_2^2+k_2^2+l_2^2)^{1/2} = 134.469/155.859 = 0.862$$

$$R_2/R_3 = d_2/d_3 = (h_2^2+k_2^2+l_2^2)^{1/2} / (h_3^2+k_3^2+l_3^2)^{1/2} = 155.859/220.554 = 0.706$$

$$R_3/R_4 = d_3/d_4 = (h_3^2+k_3^2+l_3^2)^{1/2} / (h_4^2+k_4^2+l_4^2)^{1/2} = 220.554/258.000 = 0.854$$

However, the above obtained values are only possible if the planes are {111}, {200}, {220}, {311} as

$$R_1/R_2 = 0.862 \sim (1^2+1^2+1^2)^{1/2} / (2^2+0^2+0^2)^{1/2} = 0.866$$

$$R_2/R_3 = 0.706 \sim (2^2+0^2+0^2)^{1/2} / (2^2+2^2+0^2)^{1/2} = 0.707$$

$$R_3/R_4 = 0.854 \sim (2^2+2^2+0^2)^{1/2} / (3^2+1^2+1^2)^{1/2} = 0.852$$

Thus, we can conclude that allowed reflections are for an fcc crystal lattice. The order of rings in increasing radius are: {111}, {200}, {220}, {311}, {222}, {400}, {331}, {420}, {422} ...

**Table S1- Third-order non-linear susceptibility  $\chi^{(3)}$  of various nanoparticle systems reported in the literature**

| S.No | Material                  | Reference        | $\chi^{(3)}$ material    | $\chi^{(3)}$ standard    | Reference    |
|------|---------------------------|------------------|--------------------------|--------------------------|--------------|
| 1    | AgNPs- CoA in water       | CS <sub>2</sub>  | 1.38 X 10 <sup>-13</sup> | 1.75 X 10 <sup>-12</sup> | Present work |
| 2    | AgNPs in water            | CS <sub>2</sub>  | 2.95 X 10 <sup>-14</sup> | -                        | (45)         |
| 3    | Ag colloids in acetone    | CCL <sub>4</sub> | 1.89×10 <sup>-14</sup>   | 4.40 ×10 <sup>-14</sup>  | (52)         |
| 4    | Ag colloids in DCM        | CCL <sub>4</sub> | 3.6×10 <sup>-12</sup>    | 4.40×10 <sup>-14</sup>   | (52)         |
| 5    | Ag colloids in chloroform | CCL <sub>4</sub> | 5.3×10 <sup>-13</sup>    | 4.40 ×10 <sup>-14</sup>  | (52)         |
| 6    | AgNPs in water            | CS <sub>2</sub>  | 7.7 × 10 <sup>-14</sup>  | 9.32 ×10 <sup>-12</sup>  | (53)         |
| 7    | AuNPs in water            | CS <sub>2</sub>  | 5.52 × 10 <sup>-13</sup> | 9.32 ×10 <sup>-12</sup>  | (53)         |
| 8    | AuNPs in water            | CCL <sub>4</sub> | 1.93×10 <sup>-14</sup>   | 4.40×10 <sup>-14</sup>   | (54)         |
